# Supplementary material for: Histone deacetylase inhibitors with high in vitro activities against Plasmodium falciparum isolates collected from Gabonese children and adults
Source: PubMed Central journal article supplement (PMC6874535; doi:10.1038/s41598-019-53912-w), 2019-11-22
Supplement: 41598_2019_53912_MOESM1_ESM.pdf [file 41598_2019_53912_MOESM1_ESM.pdf]

**Title:** Histone deacetylase inhibitors with high in vitro activities against *Plasmodium falciparum* isolates collected from Gabonese children and adults

**Authors:** Erik Koehne<sup>a,b\*</sup>, Andrea Kreidenweiss<sup>a,b\*</sup>, Rella Zoleko Manego<sup>b,c</sup>, Matthew McCall<sup>b</sup>, Ghyslain Mombo-Ngoma<sup>b,c</sup>, Marcel Karl Walter Mackwitz<sup>d</sup>, Finn K. Hansen<sup>d</sup>, Jana Held<sup>a,b</sup>

**Author Affiliations:**

<sup>a</sup> Institute of Tropical Medicine, University Hospital Tübingen, Wilhelmstrasse 27, D-72074 Tübingen, Germany;

<sup>b</sup> Centre de Recherches Médicales de Lambaréné, B.P. 242, Lambaréné, Gabon;

<sup>c</sup> Department of Tropical Medicine, Bernhard Nocht Institute for Tropical Medicine & I. Dep of Medicine, University Medical Centre- Hamburg-Eppendorf, Bernhard-Nocht-Strasse 74, D-20359 Hamburg, Germany;

<sup>d</sup> Institute of Pharmacy, Medical Faculty, University of Leipzig University, Brüderstrasse 34, D-04103 Leipzig, Germany

\*These authors contributed equally to this work

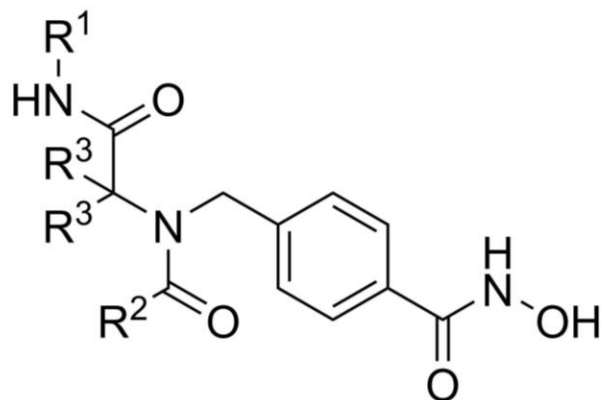

| Compound ID | R <sup>1</sup> | R <sup>2</sup>         | R <sup>3</sup> |
|-------------|----------------|------------------------|----------------|
| <b>1a</b>   | <i>t</i> -Bu   | 3,4-Me-Ph              | H              |
| <b>1d</b>   | <i>t</i> -Bu   | 4-Me <sub>2</sub> N-Ph | H              |
| <b>1g</b>   | <i>c</i> -Hex  | 1-Naphthyl             | H              |
| <b>1h</b>   | <i>c</i> -Hex  | 4-Me <sub>2</sub> N-Ph | H              |
| <b>1i</b>   | <i>c</i> -Hex  | 3,5-Me-Ph              | H              |
| <b>1u</b>   | <i>c</i> -Hex  | 4- <i>i</i> -Pr-Ph     | H              |
| <b>1v</b>   | <i>n</i> -Bu   | 4-Me <sub>2</sub> N-Ph | H              |
|             |                |                        |                |
| <b>2c</b>   | <i>c</i> -Hex  | 4-Me <sub>2</sub> N-Ph | Me             |
| <b>2g</b>   | Bn             | 4- <i>t</i> -Bu-Ph     | H              |
| <b>2h</b>   | Bn             | 4- <i>i</i> -Pr-Ph     | H              |
| <b>2i</b>   | Bn             | 4-Me <sub>2</sub> N-Ph | H              |
| <b>2m</b>   | 4-F-Bn         | 3,5-Me-Ph              | H              |

**Supplementary Figure 1: Chemical structures of tested compounds**

Chemical structures have already been published <sup>5,6</sup>

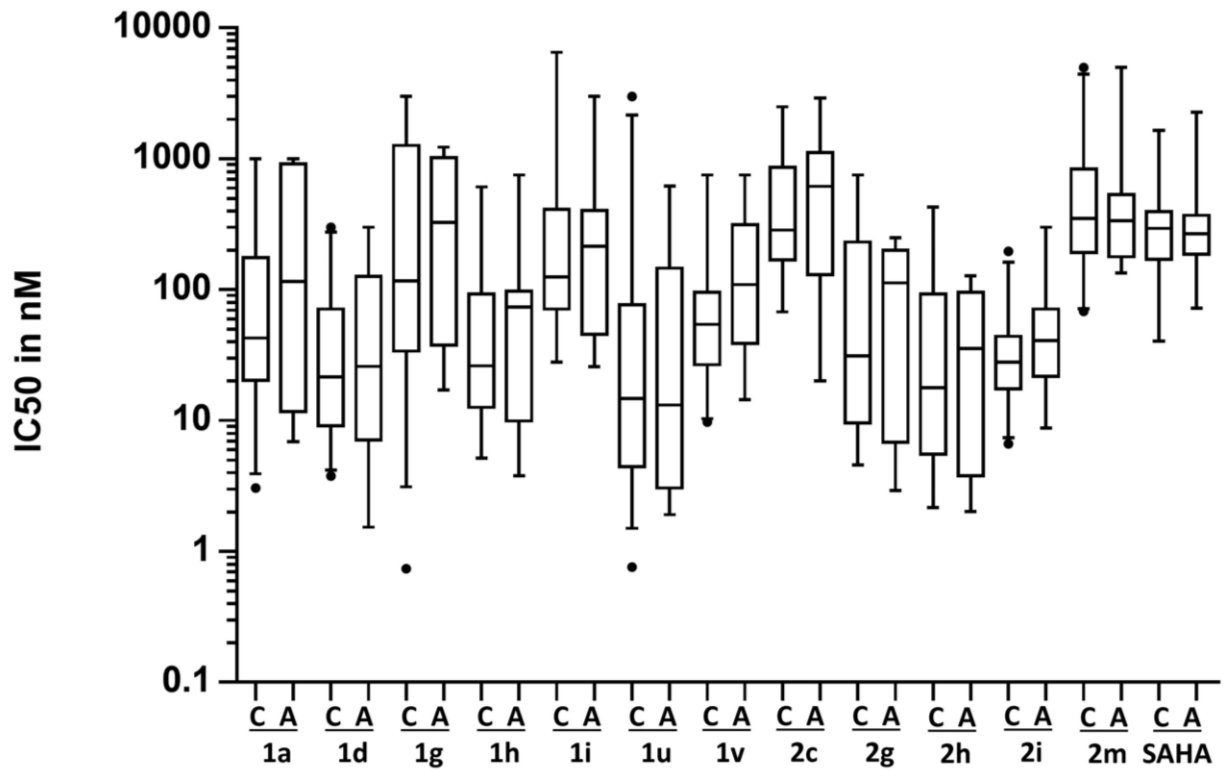

**Supplementary Figure 2: Distribution of IC50 values**

Distribution of IC50 values of HDACi candidates against *P. falciparum* isolates obtained from children (C) and adults (A). SAHA: suberoylanilide hydroxamic acid (Vorinostat). Box plots show median IC50 and 25% and 75% quartiles, respectively. Whiskers extend to the 5<sup>th</sup> and 95<sup>th</sup> percentiles. Dots outside the whiskers are outlier IC50 values.

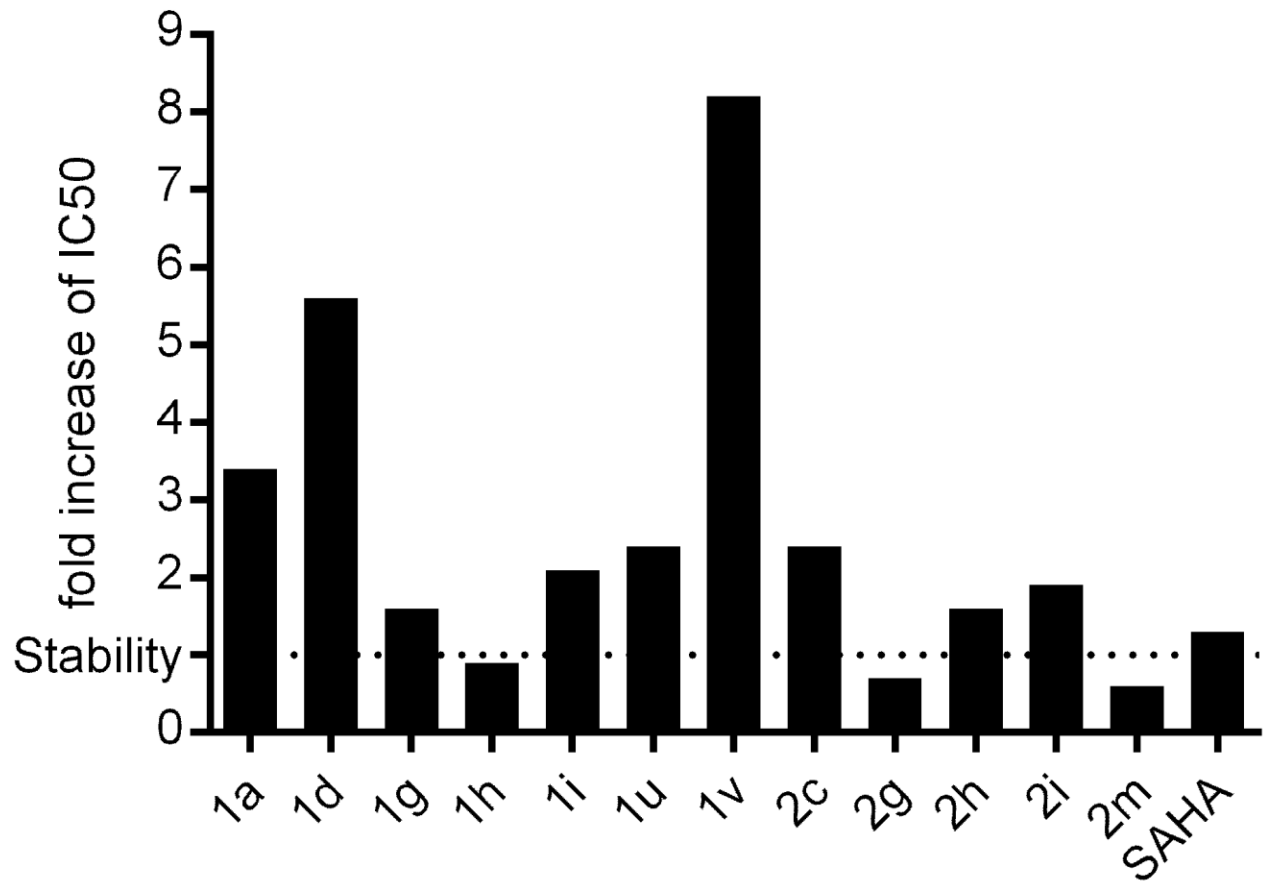

**Supplementary Figure 3: Stability of HDACi candidates**

Fold increase of IC50 at study end determined in *P. falciparum* 3D7. Fold increase (IC50 at study end/IC50 at study start) of 1 represents stability of compound at study end.
